# Supplementary material for: Targeted deletion of Interleukin-3 results in asthma exacerbations
Source: PubMed Central journal article supplement — iScience. 2022 May 23;25(6):104440. doi: 10.1016/j.isci.2022.104440 (PMC9189047; doi:10.1016/j.isci.2022.104440), 2022-05-23
Supplement: mmc1.pdf [file mmc1.pdf]

**iScience, Volume 25**

**Supplemental information**

**Targeted deletion of Interleukin-3**

**results in asthma exacerbations**

**Julia Kölle, Theodor Zimmermann, Alexander Kiefer, Ralf J. Rieker, Paraskevi Xepapadaki, Sebastian Zundler, Nikolaos G. Papadopoulos, and Susetta Finotto**

## Supplementary Figures

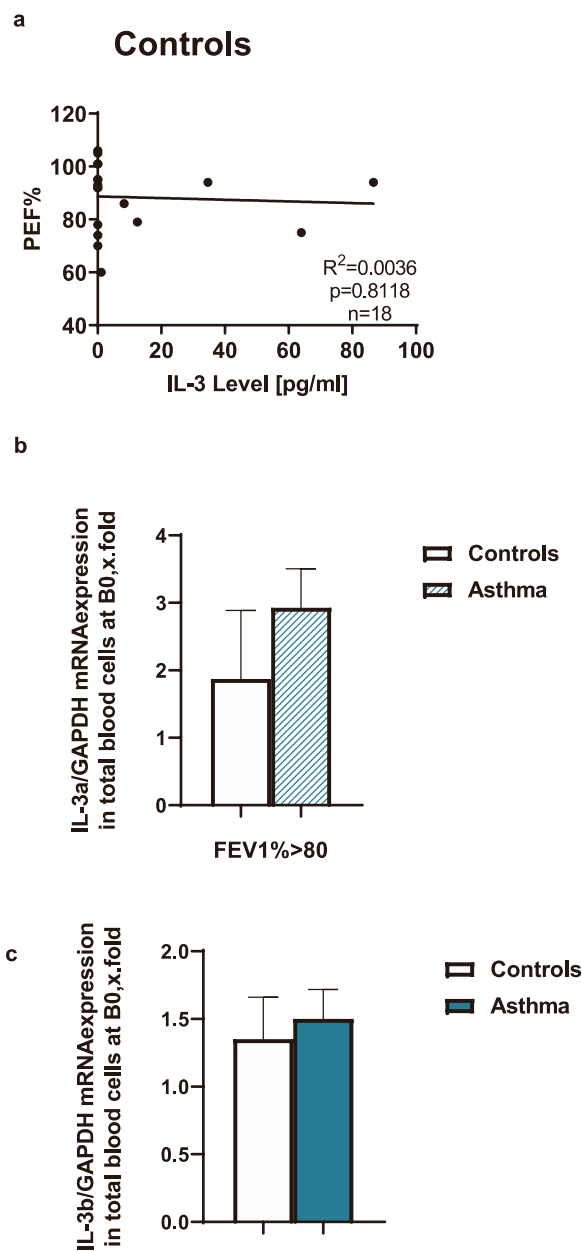

**Figure S1: IL-3 in pediatric asthma, related to Figure 1c (a) and Figure 2 (b,c), respectively.** (a) Correlation between the IL-3 level quantified by ELISA in the supernatant from PHA stimulated PBMCs isolated from healthy control children and the PEF% predicted (PEF% predicted healthy controls  $n=18$ ) at the baseline visit; related to Figure 1c. (b, c) *IL3Ra/GAPDH* mRNA (b) and *IL3Rb/GAPDH* mRNA (c) expression in total blood cells from healthy control children ( $n=8$ ) and asthmatic children ( $n=5$ ) at baseline visit; related to Figure 2. Data are presented as means  $\pm$  SEMs. Two-tailed student *t* test was used to calculate statistical significance. \*  $p \leq 0.05$ ; \*\*  $p \leq 0.01$ , \*\*\*  $p \leq 0.001$ , \*\*\*\*  $p \leq 0.0001$ .

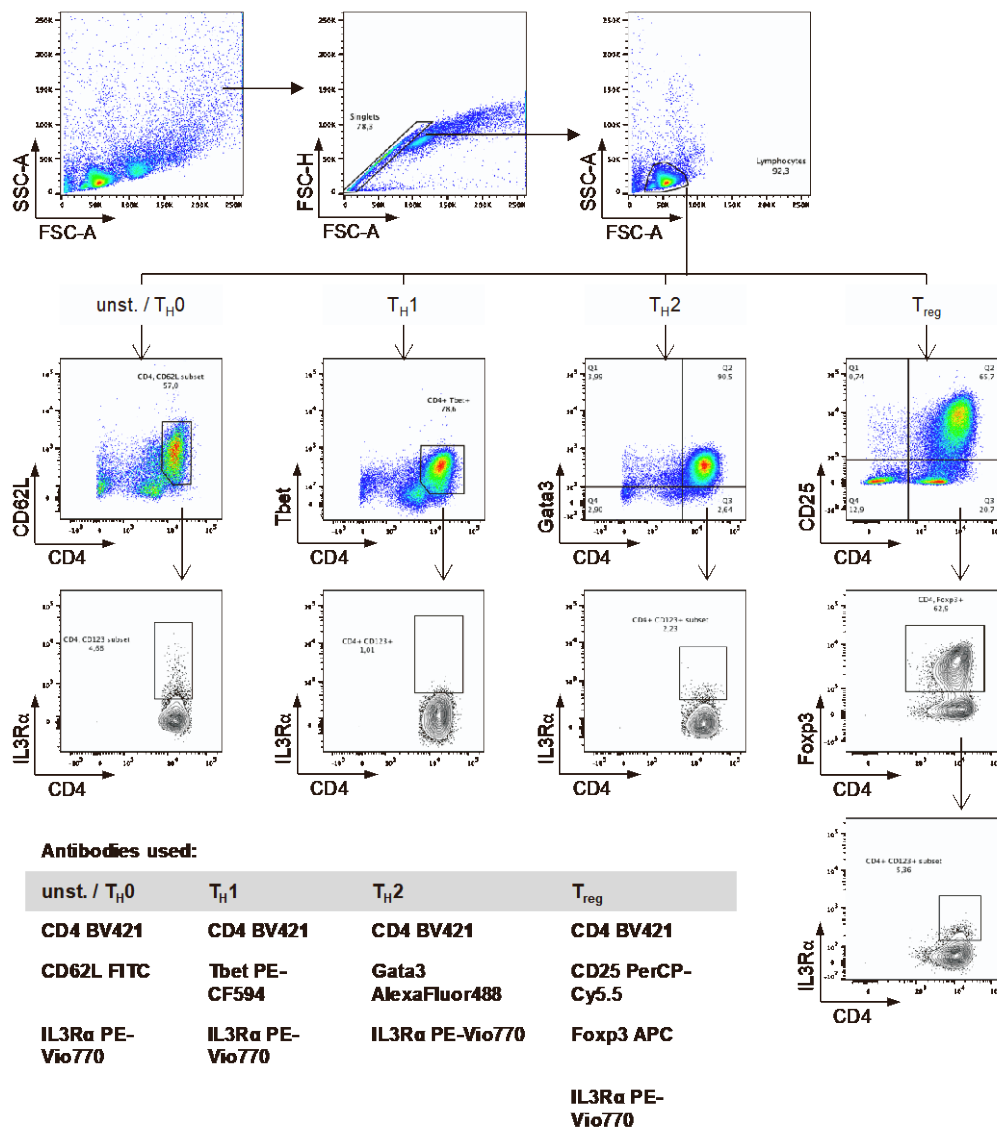

**Figure S2: Spleen T cell differentiation of WT and IL-3 deficient mice, related to figure 3.** Gating strategy of differentiated spleen T cells of WT and IL-3 deficient mice including the analysis of the IL3R $\alpha$  expression on the differentiated T cell subtypes related to Figure 3. The respective used flow cytometry antibodies are listed below. Representative dot- and contourplots, respectively, are shown.

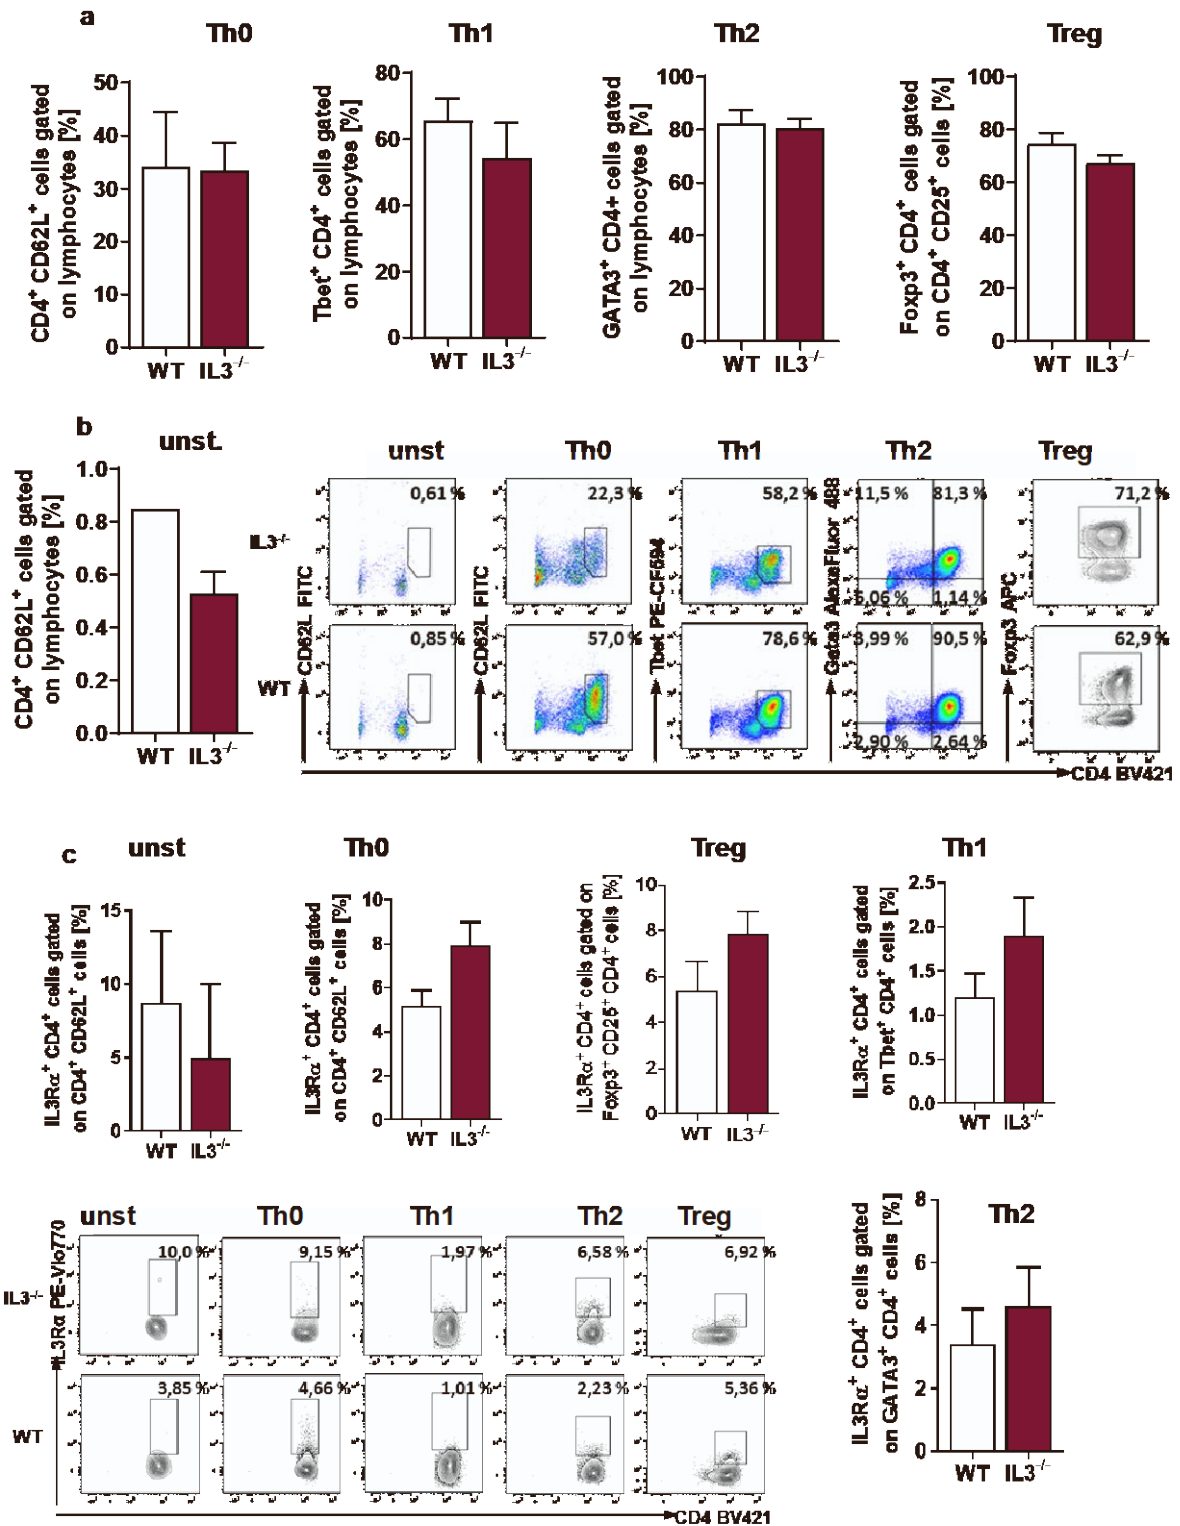

**Figure S3: IL-3 and IL-3 $\alpha$  characterization in the spleen T cells of WT and IL-3 deficient mice, related to Figure 3. (a, b) Flow cytometry analysis of the different T cell subtypes based on the indicated, specific cell markers (n=2/2 (unstimulated), n= 4/4 (T<sub>h0</sub>, T<sub>reg</sub>), n=4/3 (T<sub>h1</sub>), n=3/4 (T<sub>h2</sub>)). (c) Flow cytometry analysis of the IL3R $\alpha$  expression on the differentiated T cell subtypes (n=2/2 (unstimulated), n= 4/4 (T<sub>h0</sub>, T<sub>reg</sub>), n=4/3 (T<sub>h1</sub>), n=3/4 (T<sub>h2</sub>)). Representative dot- and contourplots, respectively, are shown. Data are presented as means  $\pm$  SEMs. Two-tailed student *t* test, Two-way ANOVA or ordinary One-way ANOVA was used to calculate statistical significance. \*  $p \leq 0.05$ ; \*\*  $p \leq 0.01$ , \*\*\*  $p \leq 0.001$ , \*\*\*\*  $p \leq 0.0001$ .**

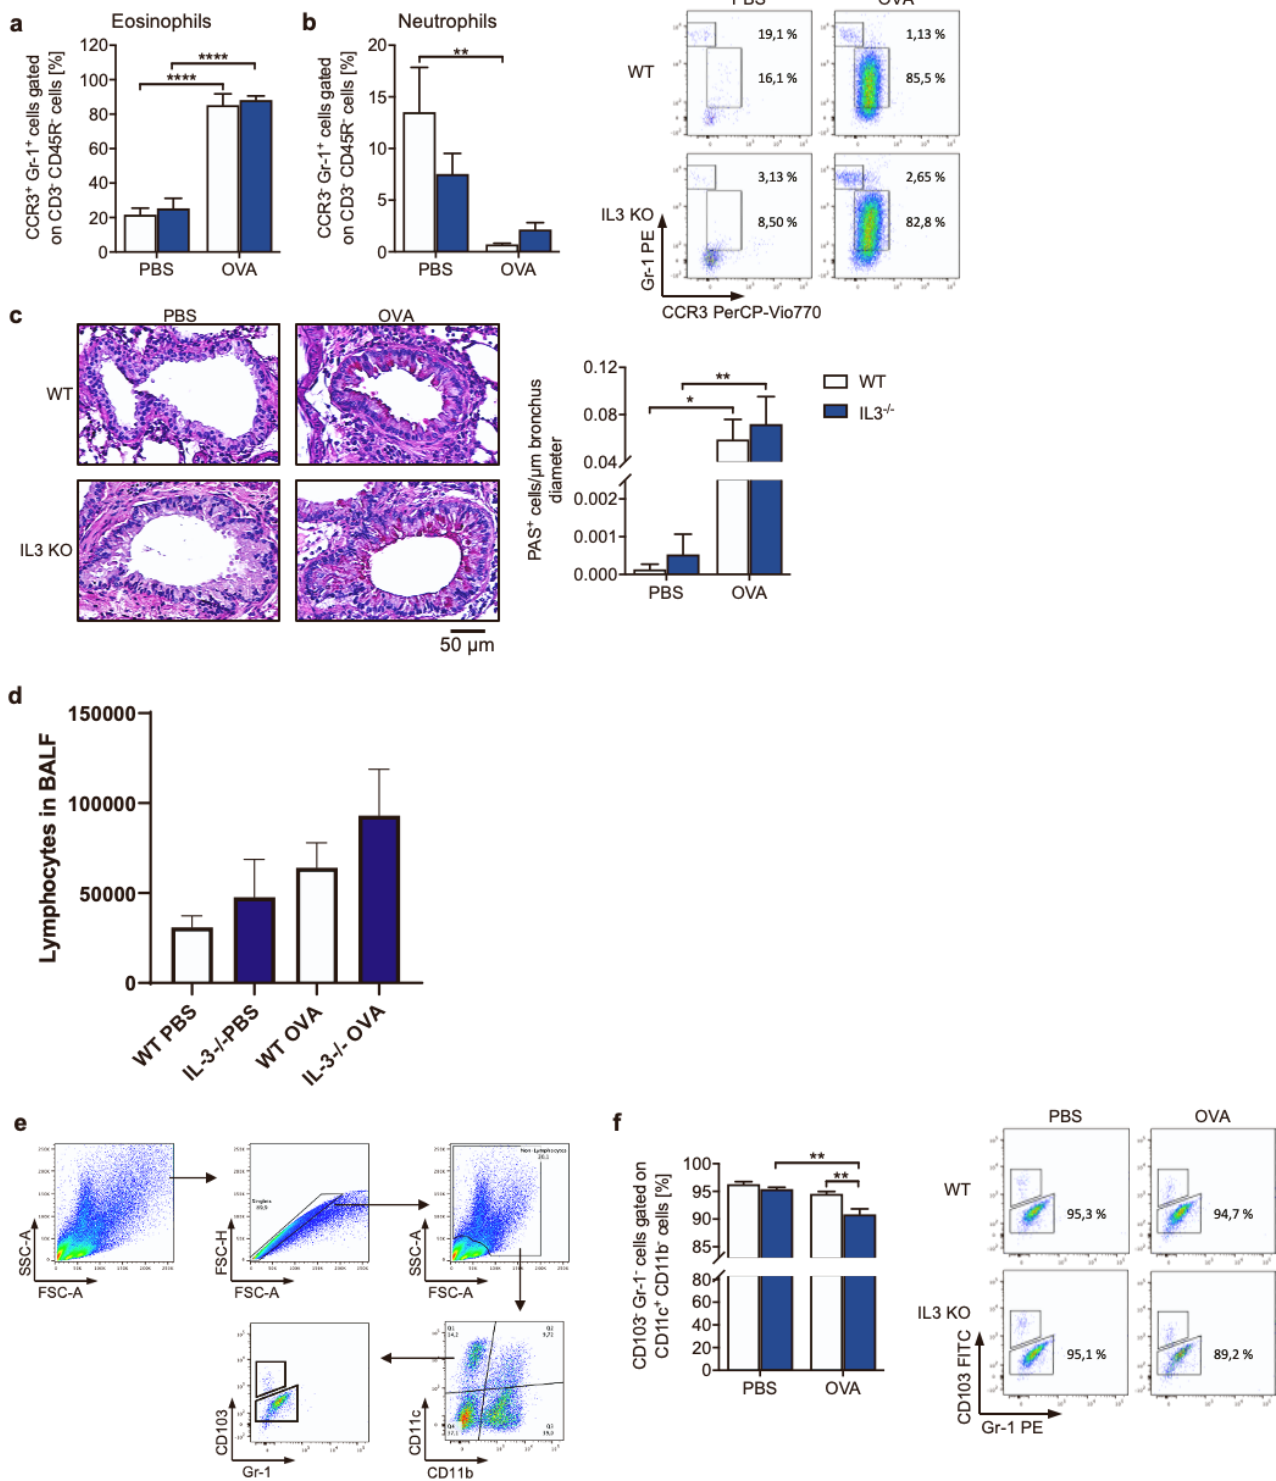

**Figure S4: Characterization of IL-3<sup>-/-</sup> mice in an OVA-induced asthma model, Figure S4-d related to Figure 4 and Figure S4e, f related to Figure 5b. (a, b)** Flow cytometry analysis of CCR3<sup>+</sup> Gr-1<sup>+</sup> eosinophils and CCR3<sup>-</sup> Gr-1<sup>+</sup> neutrophils in the BALF from Balb/c WT and IL3<sup>-/-</sup> mice with and without asthma (n=10/10/9/10). **(c)** Analysis of PAS<sup>+</sup> cells per μm bronchus diameter (n=15/15/13/14) in the lungs of WT and IL3<sup>-/-</sup> mice with and without asthma and corresponding pictures of Periodic acid-Schiff (PAS) staining. **(d)** Analysis of Lymphocytes in the BALF of WT and IL3<sup>-/-</sup> mice with and without asthma (n=5,2,4,5). **(e, f)** Flow cytometry analysis of CD103<sup>-</sup> Gr-1<sup>-</sup> cells in total lung cells isolated from Balb/c WT and IL3<sup>-/-</sup> mice with and without asthma (n=4/4/5/5). A representative dot plot is shown for each group. Data are presented as means ± SEMs. Two-way

ANOVA was used to calculate statistical significance. \*  $p \leq 0.05$ ; \*\*  $p \leq 0.01$ , \*\*\*  $p \leq 0.001$ , \*\*\*\*  $p \leq 0.0001$ .

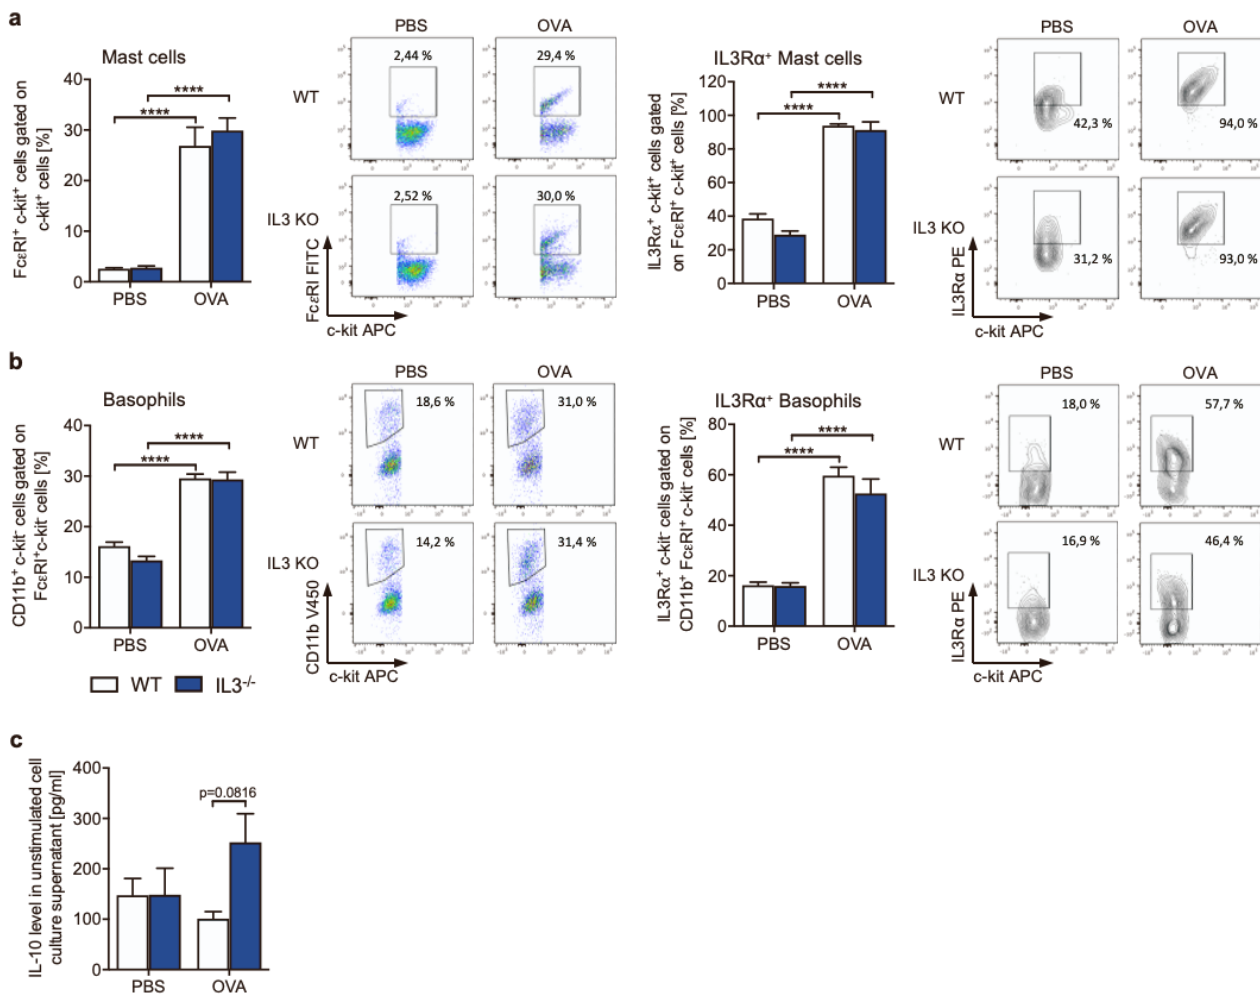

**Figure S5: Mast cells and basophils in OVA-treated IL-3<sup>-/-</sup> mice, Figure S5a, b related to Figure 5 and Figure S5c related to Figure 6.** (a) Flow cytometry analysis of mast cells (left) and IL3Rα<sup>+</sup> mucosal mast cells (right) in total lung cells isolated from Balb/c WT and IL3<sup>-/-</sup> mice with and without asthma (n=4/4/5/5). (b) Flow cytometry analysis of basophils (left) and IL3Rα<sup>+</sup> basophils (right) in total lung cells isolated from Balb/c WT and IL3<sup>-/-</sup> mice with and without asthma (n=5/5/5/5). (c) ELISA analysis of the IL-10 level in cell culture supernatants obtained from total lung cells and cultured *in vitro* for 24h of Balb/c WT and IL-3<sup>-/-</sup> mice with and without asthma (n=9/9/10/10). A representative dot plot is shown for each group. Data are presented as means ± SEMs. Two-way ANOVA was used to calculate statistical significance. \*  $p \leq 0.05$ ; \*\*  $p \leq 0.01$ , \*\*\*  $p \leq 0.001$ , \*\*\*\*  $p \leq 0.0001$

## Supplementary Tables

**Table S1: Demographic and clinical data of the healthy PreDicta cohort WP1-UK-ER analyzed at the baseline visit. Related to STAR Methods (section 'Human Study').**

| Patient        | Age         | Gender                     | Skin Prick Test*              | Atopic dermatitis          |
|----------------|-------------|----------------------------|-------------------------------|----------------------------|
| C1             | 6           | male                       | n.d.                          | no                         |
| C2             | 6           | female                     | n.d.                          | no                         |
| C3             | 5           | male                       | n.d.                          | no                         |
| C4             | 4           | male                       | n.d.                          | No                         |
| C5             | 4           | female                     | n.d.                          | No                         |
| C6             | 5           | female                     | n.d.                          | No                         |
| C7             | 5           | female                     | negative                      | No                         |
| C8             | 3           | male                       | n.d.                          | No                         |
| C9             | 6           | male                       | n.d.                          | Yes                        |
| C10            | 4           | female                     | n.d.                          | No                         |
| C11            | 6           | male                       | n.d.                          | No                         |
| C12            | 4           | male                       | negative                      | No                         |
| C13            | 5           | female                     | n.d.                          | No                         |
| C14            | 5           | female                     | al                            | No                         |
| C15            | 4           | male                       | ca, f                         | No                         |
| C16            | 5           | male                       | n.d.                          | No                         |
| C17            | 4           | male                       | negative                      | No                         |
| C18            | 4           | female                     | negative                      | No                         |
| C19            | 5           | male                       | negative                      | No                         |
| C20            | 4           | male                       | negative                      | No                         |
| C21            | 5           | male                       | negative                      | Yes                        |
| <b>Average</b> | 4.71 ± 0.18 | m. = 61.9 %<br>f. = 38.1 % | pos. = 9.5 %<br>neg. = 33.3 % | yes = 9.5 %<br>no = 90.5 % |

\*al, *Alternaria* species; ca, cat; f, *Dermatophagoides* mix; n.d., not done.

**Table S2: Demographic and clinical data of the asthmatic PreDicta cohort WP1-UK-ER analyzed at the baseline visit. Related to STAR Methods (section ‘Human Study’).**

| Patient        | Age         | Gender                     | Asthma Severity *                        | Phenotype **                                       | Skin Prick Test***             | Atopic dermatitis           |
|----------------|-------------|----------------------------|------------------------------------------|----------------------------------------------------|--------------------------------|-----------------------------|
| A1             | 6           | male                       | I                                        | v                                                  | al, ca, g                      | yes                         |
| A2             | 6           | male                       | II                                       | u                                                  | al, b, g                       | yes                         |
| A3             | 5           | female                     | II                                       | u                                                  | ca                             | no                          |
| A4             | 6           | male                       | II                                       | a                                                  | al, am, ca, f, g               | yes                         |
| A5             | 5           | male                       | I                                        | u                                                  | ca                             | no                          |
| A6             | 5           | female                     | I                                        | u                                                  | al                             | no                          |
| A7             | 5           | male                       | I                                        | v                                                  | g                              | yes                         |
| A8             | 4           | female                     | II                                       | v,a                                                | g                              | yes                         |
| A9             | 6           | female                     | I                                        | v                                                  | b, g                           | yes                         |
| A10            | 5           | male                       | II                                       | e,v                                                | negative                       | no                          |
| A11            | 4           | male                       | III                                      | e                                                  | negative                       | no                          |
| A12            | 5           | female                     | III                                      | a,v                                                | ca, f, g                       | no                          |
| A13            | 6           | female                     | I                                        | a,e,v                                              | b, ca, f, g                    | yes                         |
| A14            | 5           | male                       | I                                        | v                                                  | ca, f, g                       | yes                         |
| A15            | 4           | female                     | I                                        | v                                                  | negative                       | no                          |
| A16            | 4           | male                       | I                                        | v                                                  | negative                       | no                          |
| A17            | 5           | male                       | I                                        | v                                                  | ca, f, g                       | no                          |
| A18            | 4           | male                       | I                                        | v                                                  | al, b, ca, f, g                | yes                         |
| A19            | 5           | male                       | I                                        | v                                                  | al, am, b, ca, f, g            | yes                         |
| A20            | 4           | male                       | I                                        | v                                                  | b                              | no                          |
| A21            | 4           | male                       | I                                        | v                                                  | negative                       | no                          |
| A22            | 5           | female                     | I                                        | e                                                  | n.d.                           | no                          |
| A23            | 5           | male                       | II                                       | a,e,v                                              | al, b, ca, f, g                | no                          |
| A24            | 5           | female                     | II                                       | v                                                  | negative                       | no                          |
| <b>Average</b> | 4.92 ± 0.15 | m. = 62.5 %<br>f. = 37.5 % | I = 62.5 %<br>II = 29.2 %<br>III = 8.3 % | u = 16.7 %<br>v = 70.8 %<br>a = 4.2 %<br>e = 8.3 % | pos. = 73.9 %<br>neg. = 26.1 % | yes = 41.7 %<br>no = 58.3 % |

\* I=Intermittent: FEV1 > 80 %, MEF > 65 %, symptom-free interval > 2 months; II= Mild Persistent: FEV1 > 80 %, MEF > 65 %, symptom-free interval < 2 months; III= Moderate persistent: FEV1 < 80 %, MEF < 65 %, symptoms several days a week; IV= Severe persistent: FEV1 < 60 %, Symptoms during the day and night. \*\* v, virus-induced; a, allergen-induced; e, exercise-induced; u, unresolved. \*\*\*al, *Alternaria* species; am, ambrosia; b, birch; ca, cat; f, *Dermatophagoides* mix; g, grass pollen mix; n.d., not done. FEV1: forced expiratory volume in 1 second / forced vital capacity; MEF: mean expiratory flow.



**Table S3: Spirometry (pre-bronchodilation) data of the healthy and asthmatic PreDicta cohort WP1-UK-ER analyzed at the baseline visit. Related to STAR Methods (section ‘Spirometry’).**

| Patient | PEF % predicted | FVC % predicted | FEV1 % predicted |
|---------|-----------------|-----------------|------------------|
| C1      | 75              | 73              | 77               |
| C2      | 94              | 117             | 121              |
| C3      | 94              | 100             | 110              |
| C4      | 78              | 104             | 118              |
| C5      | 92              | 99              | 111              |
| C6      | n.e.            | n.e.            | n.e.             |
| C7      | 60              | 101             | 84               |
| C8      | n.e.            | n.e.            | n.e.             |
| C9      | 86              | 113             | 105              |
| C10     | 93              | 99              | 109              |
| C11     | 95              | 86              | 87               |
| C12     | 70              | 89              | 100              |
| C13     | 105             | 102             | 112              |
| C14     | 95              | 109             | 119              |
| C15     | 75              | 103             | 113              |
| C16     | 101             | 95              | 111              |
| C17     | 101             | 97              | 109              |
| C18     | 74              | 83              | 92               |
| C19     | 79              | 113             | 123              |
| C20     | 106             | 106             | 121              |
| C21     | 92              | 97              | 109              |
| A1      | 132             | 119             | 126              |
| A2      | n.e.            | n.e.            | n.e.             |
| A3      | 80              | 89              | 95               |
| A4      | 127             | 115             | 128              |
| A5      | 86              | 97              | 102              |
| A6      | 119             | 129             | 129              |
| A7      | 117             | 125             | 143              |
| A8      | 88              | 106             | 115              |
| A9      | 77              | 100             | 98               |
| A10     | 84              | 91              | 96               |
| A11     | 106             | 102             | 115              |
| A12     | 75              | 114             | 92               |
| A13     | 104             | 106             | 111              |
| A14     | 90              | 85              | 99               |
| A15     | 107             | 122             | 135              |
| A16     | 82              | 90              | 99               |
| A17     | 65              | 92              | 88               |
| A18     | 65              | 92              | 87               |
| A19     | 86              | 97              | 101              |
| A20     | 60              | 64              | 71               |
| A21     | 54              | 76              | 77               |
| A22     | 92              | 103             | 98               |
| A23     | 99              | 91              | 81               |

|     |    |    |    |
|-----|----|----|----|
| A24 | 53 | 92 | 69 |
|-----|----|----|----|

FEV1: forced expiratory volume in 1 second / forced vital capacity; FVC: forced vital capacity; n.e.: not evaluable; n.m.: not measured; PEF: peak expiratory flow.
